# Supplementary material
Source: PubMed Central journal article supplement (PMC3076886)
Supplement: 1015938108_pnas.201015938SI.pdf [file 1015938108_pnas.201015938SI.pdf]

# Supporting Information

Kondo et al. 10.1073/pnas.1015938108

## SI Materials and Methods

**Tumor Cell Preparation.** A total of 117 colorectal cancer samples were obtained from 107 patients at the Osaka Medical Center for Cancer and Cardiovascular Diseases (Table S1). The study protocol was approved by the local ethics committee. Surgical specimens and endoscopic biopsy specimens were minced into 2-mm cubes using forceps or razor blades and washed several times with HBSS. Tumor fragments were digested with 0.26 U/mL Liberase DH solution (Roche Diagnostics) at 37 °C for 2 h. The partially digested tissue was filtered through a 500- $\mu$ m mesh metal filter and a 100- $\mu$ m mesh filter (Becton Dickinson). The filtrate was refiltered through a 40- $\mu$ m cell strainer. The tumor tissue retained in the strainer was collected, washed twice with HBSS, and transferred to stem cell medium [StemPro hESC medium (Invitrogen) supplemented with 8 ng/mL bFGF (Invitrogen)]. The detailed method is described herein.

**CTOS Culture.** CTOSs were cultured in suspension in stem cell medium. For 3D culture, the CTOSs were embedded in Cellmatrix type I-A (Nitta Gelatin) droplets on untreated tissue culture dishes and overlaid with stem cell medium. The medium was changed two to three times a week. For further analysis or passage, CTOSs were released from the Cellmatrix after 1–2 wk of cultivation by incubation with 0.2 mg/mL collagenase type 4 (Worthington). For expansion, CTOSs were cut into cell clusters using 23-gauge needles, and the cell clusters were transferred to fresh StemPro medium. The next day, the newly formed CTOSs were again embedded in Cellmatrix droplets, and culture was repeated. The serum-containing medium was DMEM (Invitrogen) supplemented with 10% FBS (Gibco). The detailed method is described herein.

**Animal Studies.** Animal studies were performed in compliance with the guidelines of our institutional animal studies committee. For primary colon cancer transplantation, tissue specimens were minced with scissors into ~2-mm cubes and implanted s.c. in the flanks of NOD/SCID mice (Charles River Laboratories). For implantation, CTOSs were injected s.c. in the flanks of the mice. Recipient mice were anesthetized by i.p. injection of pentobarbital before implantation or injection. Mice were observed for up to 6 mo and killed when tumors reached 10 mm in diameter. The number of sites with tumors is shown as a fraction of the number of inoculated sites (Table S2). CTOS preparation from xenograft tumors was performed as described for primary human tumors.

**Cell Lines.** HCT116 and WiDr cells were obtained from ATCC. HCT116 spheroids were generated by suspension culture. Cells were harvested by tryptic dissociation, and suspended in serum containing medium on nontreated dish. For implantation, HCT116 or WiDr cells were injected s.c. in the flanks of the mice.

**Flow Cytometry Analysis.** CTOSs were washed with PBS and treated briefly with 0.25% trypsin/EDTA. Dispersed cells were washed with HBSS containing 7 mg/mL trypsin inhibitor (Sigma). Antibodies used were EpCAM, CD133 (Miltenyi), CD45, CD31, and mouse IgG isotype control (BD Pharmingen). Cells were incubated in HBSS containing 0.5% BSA with fluorescence-conjugated primary antibodies at 4 °C in the dark for 30 min. Isotype-matched mouse Ig served as the control. Samples were analyzed using a FACSCalibur flow cytometer (BD Biosciences) and FlowJo software (Tree Star).

**Apoptosis Detection.** Cell-surface annexin-V expression and propidium iodide (PI) uptake were detected by flow cytometry or fluorescence microscopy (Olympus) using the Annexin V-FITC Apoptosis Detection Kit (Biovision). Western blotting was performed as described previously (1). The antibodies used were caspase-3, cleaved caspase-3, Akt, pAkt(473), Erk, pErk (Cell Signaling), and PARP (BD Pharmingen). The ApopTag Red in Situ Apoptosis Detection Kit (Chemicon) was used for TUNEL staining according to the manufacturer's instructions.

**Immunohistochemistry.** Immunohistochemistry was performed as described previously (2). The primary antibodies used for immunohistochemistry were E-cadherin (Takara),  $\beta$ -catenin (BD Bioscience),  $\alpha$ -SMA (Sigma), CD68 (DAKO), villin (Santa Cruz), and TP-53 (Novocastra). Antigen retrieval was performed on formalin-fixed paraffin-embedded samples by microwaving samples in 10 mM citrate buffer (pH 6.0). After incubation with secondary antibodies and treatment with the Vectastain ABC Kit (Vector Laboratories), peroxidase activity was visualized with Vector NovaRED (Vector Laboratories). The sections were counterstained with hematoxylin. Frozen tissue samples were fixed with acetone/methanol. After incubation with Alexa-488- or Alexa-594-conjugated secondary antibody (Molecular Probes), the sections were examined by fluorescence microscopy.

**Cell-Cell Contact Inhibition.** For enforced enzymatic disperse, CTOSs were treated briefly with 0.25% trypsin/EDTA. Cells were then cultured in StemPro medium and collected at the indicated time points. For inhibition assays of E-cadherin-dependent cell-cell contact, CTOSs were precultured in Cellmatrix gel. CTOSs were removed from gel by treatment with 0.1 mg/mL collagenase type 4 (Worthington) for 1 h and washed with PBS. Then CTOSs were suspended in fresh medium containing anti-E-cadherin neutralizing antibody (clone SHE 78-7; Takara) or mouse IgG isotype control (Sigma), and collected at the indicated time points. Collected cells or CTOSs were washed once with cold PBS and analyzed by Western blotting.

**Evaluation of CTOS Growth and Passage.** Growth was evaluated after CTOSs were cultured in Cellmatrix type I-A for 1 wk. The CTOS growth ratio was calculated as follows: (major axis length)  $\times$  (minor axis length) after cultivation / (major axis length)  $\times$  (minor axis length) before cultivation. Successful growth was achieved if the CTOS growth ratio was  $>2$ . Successful passage was achieved when the CTOS formed a secondary CTOS after mechanical dissociation, and this secondary CTOS achieved successful growth. Table 1 summarizes the CTOS formation, growth, and passage results.

**Genomic Analysis.** Mutations in exon 2 of *KRAS* and exon 13 of *BRAF* were detected by direct sequencing. DNA was extracted from CTOSs or paraffin-embedded samples of parental tumors using the DNeasy Blood and Tissue Kit (QIAGEN). The region spanning the mutation sites was amplified by PCR using the following primers: *KRAS*: 5'-gctgctgaaatgactgaa-3' and 5'-ag-aatgctcctgcaccagtaa-3'; and *BRAF*: 5'-tgcttctctgataggaaaatg-3' and 5'-ccacaaatggatccagaca-3'. Sequencing was performed using the BigDye Terminators v1.1 Cycle Sequencing Kit and ABI PRISM 3100 Genetic Analyzer (Applied Biosystems). Detection of a human- or mouse-specific genome was performed by PCR using the following primers: human *B2M*: 5'-acccccactgaaaaa-gatga-3' and 5'-cctgacaatccaatatgc-3'; and mouse *B2M*: 5'-caccgagaatgggaagccgaa-3' and 5'-tccacacagatggagctccag-3'.

**Inhibition of the PI3K/AKT Signaling Pathway.** To evaluate the influence of PI3K inhibition on growth, CTOSs were cultured in the presence or absence of LY294002 (PI3K inhibitor; Calbiochem) at the indicated concentrations. After 7 d of cultivation, growth ratios were calculated. For assessing intracellular pathway inhibition by LY294002, CTOSs were cultured overnight in DMEM/F12 with 1% BSA, incubated with or without LY294002 at the indicated concentrations for 1 h, and then incubated with or without StemPro supplementation for another 1 h. The CTOS lysates were analyzed by Western blotting using the primary antibodies indicated above.

#### Protocol for CTOS Preparation.

- i) Place the tissue sample in 20 mL of DMEM (11965-092; Gibco) supplemented with 100 units/mL penicillin (15140-122; Gibco) and 100  $\mu$ g/mL streptomycin (15140-122; Gibco) in a 50-mL centrifuge tube on ice (2345-050; Iwaki) immediately after tumor resection or biopsy.
- ii) Store the specimen at 4 °C until ready to proceed. It is critical to start the following steps as soon as possible.
- iii) Discard the storage medium.
- iv) Wash the samples with 20 mL HBSS (14025-092; Gibco) by inverting the tube.
- v) Discard the HBSS wash solution.
- vi) Add 20 mL HBSS.
- vii) Transfer the medium and the samples to a 10-cm tissue culture dish (3020-100; Iwaki).
- viii) Remove necrotic tissue using forceps or razor blades.
- ix) Transfer the samples to 30 mL HBSS in a new 10-cm tissue culture dish.
- x) Mince the tissue with forceps or razor blades into small (1–2 mm) pieces.
- xi) Transfer the medium and the minced tissue to a 50-mL centrifuge tube.
- xii) Centrifuge at 1,000 rpm ( $200 \times g$ ) at 4 °C for 5 min.
- xiii) Discard the medium.
- xiv) Wash the samples with 20 mL HBSS by inverting the tube.
- xv) Repeat steps 12–14.
- xvi) Centrifuge at 1,000 rpm ( $200 \times g$ ) at 4 °C for 5 min.
- xvii) Discard the HBSS wash solution.
- xviii) Resuspend the pellets in 20 mL DMEM supplemented with 100 units/mL penicillin, 100  $\mu$ g/mL streptomycin, and 0.28 units/mL Liberase DH (05401054; Roche).
- xix) Transfer the digestion mixture to a 100-mL sterile conical flask with a magnet bar (Fig. S6A).
- xx) Digest the samples for 2 h in a 37 °C water bath with constant stirring [Immersible Magnetic Stirrer and Controller from Scinics (MS-101, MC-303)] (Fig. S6B).
- xxi) Transfer the digestion medium to a 50-mL centrifuge tube.
- xxii) Centrifuge at 1,000 rpm ( $200 \times g$ ) at 4 °C for 5 min.
- xxiii) Discard the medium.
- xxiv) Wash the samples with 20 mL HBSS by inverting the tube.
- xxv) Filter the samples with a stainless steel wire mesh (hole size 500  $\mu$ m; Fig. S6C).
- xxvi) Transfer the filtrate to a 50-mL centrifuge tube.
- xxvii) Filter the samples with a 40- $\mu$ m cell strainer (352340; BD Biosciences).
- xxviii) Dip the bottom of the cell strainer in 30 mL HBSS in a 10-cm tissue culture dish; swirl it gently to remove the debris, the single cells, and the cell clumps with diameters <40  $\mu$ m (Fig. S6D).
- xxix) Transfer the cell strainer to a new 10-cm tissue culture dish containing 30 mL HBSS.
- xxx) Collect the organoids that remain in the cell strainer using a Pipetman (F123602; Gilson; Fig. S6E).
- xxxi) Centrifuge at 1,000 rpm ( $200 \times g$ ) at 4 °C for 5 min.
- xxxii) Discard the medium.

- xxxiii) Wash the samples with 20 mL HBSS by inverting the tube.
- xxxiv) Centrifuge at 1,000 rpm ( $200 \times g$ ) at 4 °C for 5 min.
- xxxv) Discard the HBSS wash solution.
- xxxvi) Add 4 mL serum-free stem cell medium [StemPro hESC SFM (A10007-01; Gibco) supplemented with 8 ng/mL bFGF (13256-029; Invitrogen), 0.1 mM 2-mercaptoethanol (137-06862; Wako), 100 units/mL penicillin, 100  $\mu$ g/mL streptomycin, and 25  $\mu$ g/mL amphotericin B (541-01961; Wako)].
- xxxvii) Transfer the organoids and medium to a 6-cm nontreated dish [(AG2000) Eiken Chemical or (1010-060) Iwaki].
- xxxviii) Incubate in a 5% CO<sub>2</sub>-humidified chamber at 37 °C for 24 h.
- xxxix) View under a phase contrast microscope; CTOSs appear as bright, smooth spheres.

Note: Use stainless steel wire mesh (hole size 250  $\mu$ m) or a 100- $\mu$ m cell strainer (352360; BD Biosciences), depending on the desired CTOS size (Fig. S6F).

#### Protocol for CTOS Expansion.

- i) Prepare a collagen solution by mixing the following: A, Cell-matrix type I-A (Nitta Gelatin); B, 5 $\times$  DMEM (12100-038; Gibco); C, reconstitution buffer (50 mM NaOH, 260 mM NaHCO<sub>3</sub>, 200 mM Hepes). A:B:C = 7:2:1. After mixing A and B well, add C and again mix well. Keep the reconstituted collagen solution on ice to prevent gel formation.
- ii) Pour 100  $\mu$ L reconstituted collagen solution onto a 3.5-cm nontreated dish (1000-035; Iwaki) to create a gel base (Fig. S6G).
- iii) Allow the gel to solidify at 37 °C for 30 min.
- iv) After gel formation, place the dish on ice.
- v) Using 30  $\mu$ L reconstituted collagen solution, add a second (upper) gel layer to the gel base prepared in steps 3 and 4 (Fig. S6H).
- vi) Using a microscope for observation, gently pick up CTOSs (40–100  $\mu$ m in diameter) using a Pipetman (F144801; Gilson). Typically, a 2- $\mu$ L aliquot of culture medium will contain 1–10 CTOSs.
- vii) Put the CTOSs into the upper gel layer, pipetting gently to disperse the CTOSs evenly.
- viii) Allow the gel to solidify at 37 °C for 30 min.
- ix) Add 3 mL serum-free stem cell medium [StemPro hESC SFM (A10007-01; Gibco) supplemented with 8 ng/mL bFGF (13256-029; Invitrogen), 0.1 mM 2-mercaptoethanol (137-06862; Wako), 100 units/mL penicillin, 100  $\mu$ g/mL streptomycin, and 25  $\mu$ g/mL amphotericin B (541-01961; Wako)].
- x) Incubate in a 5% CO<sub>2</sub>-humidified chamber at 37 °C for 2–3 wk until the diameters of the CTOSs are  $\sim$ 250  $\mu$ m. Change the medium every 3 d.
- xi) Discard the medium.
- xii) Digest the gels with 3 mL DMEM (11965-092; Gibco) supplemented with 0.2 mg/mL collagenase type 4 (4186; Worthington) at 37 °C for 1 h.
- xiii) Release the CTOSs from the digested gel by pipetting up and down.
- xiv) Transfer the CTOS suspension to a 15-mL centrifuge tube.
- xv) Add 10 mL PBS and mix gently.
- xvi) Centrifuge at 1,000 rpm ( $200 \times g$ ) for 2 min.
- xvii) Discard the supernatant.
- xviii) Add 5 mL HBSS containing 1% BSA and resuspend the CTOSs by pipetting; transfer them to a 60-mm nontreated culture dish (1010-060; Iwaki).
- xix) Using microscopic observation, tear CTOSs using two sterile 23-gauge needles. One needle (held with the nondominant hand) holds the CTOS steady while a needle in the dominant hand tears the CTOS. Tear each CTOS into two to four pieces.

xx) Add 3 mL serum-free stem cell medium to a new 3.5-cm nontreated dish.  
 xxi) Pick up the CTOS fragments with a pipette and transfer them to the dish prepared in step 20.

xxii) Incubate in a 5% CO<sub>2</sub>-humidified chamber at 37 °C overnight.  
 xxiii) Use a phase contrast microscope to view the CTOSs, which appear as bright, smooth spheres.

1. Kusama T, et al. (2001) Inhibition of epidermal growth factor-induced RhoA translocation and invasion of human pancreatic cancer cells by 3-hydroxy-3-methylglutaryl-coenzyme a reductase inhibitors. *Cancer Res* 61:4885-4891.

2. Ohue M, et al. (1994) A frequent alteration of p53 gene in carcinoma in adenoma of colon. *Cancer Res* 54:4798-4804.

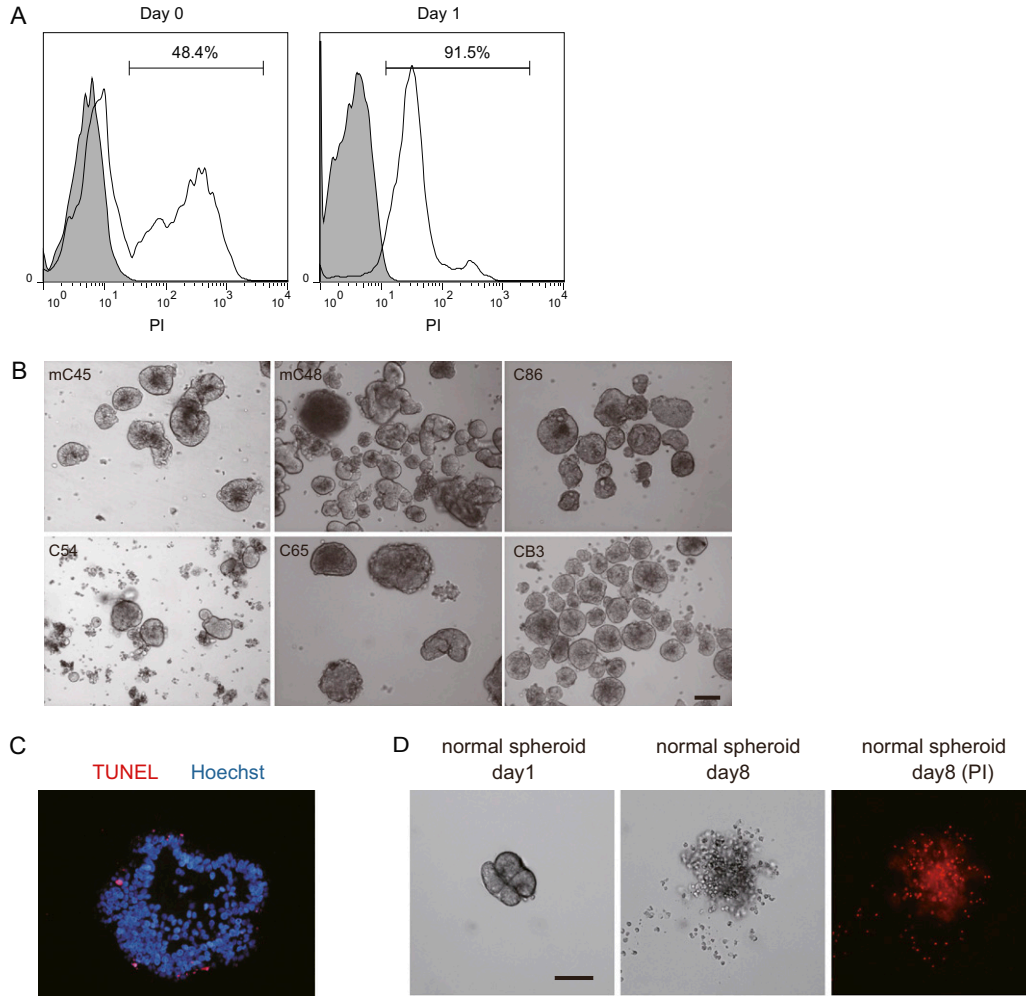

**Fig. S1.** Preparation of CTOSs and FT cells. (A) Low viability of EpCAM+ cells in the FT under suspension culture conditions. PI stainability among EpCAM-gated cells was evaluated by flow cytometry. The results of PI-treated cells are indicated with a line curve, and those of control cells are with a filled curve. (B) Formation of CTOSs from colorectal cancers from the indicated patients and from the endoscopic biopsy specimen CB3. Phase contrast images of CTOSs on day 1 are shown. (Scale bar: 100  $\mu$ m.) (C) TUNEL (red) and Hoechst 33342 (blue) staining of a CTOS. (D) Phase contrast picture of a spheroid prepared from normal colon mucosa at day 1 (Left). The spheroid was cultured under the CTOS culture conditions. The images of the same spheroid at day 8 after preparation: phase contrast (Center) and PI staining (Right). (Scale bar: 100  $\mu$ m.)

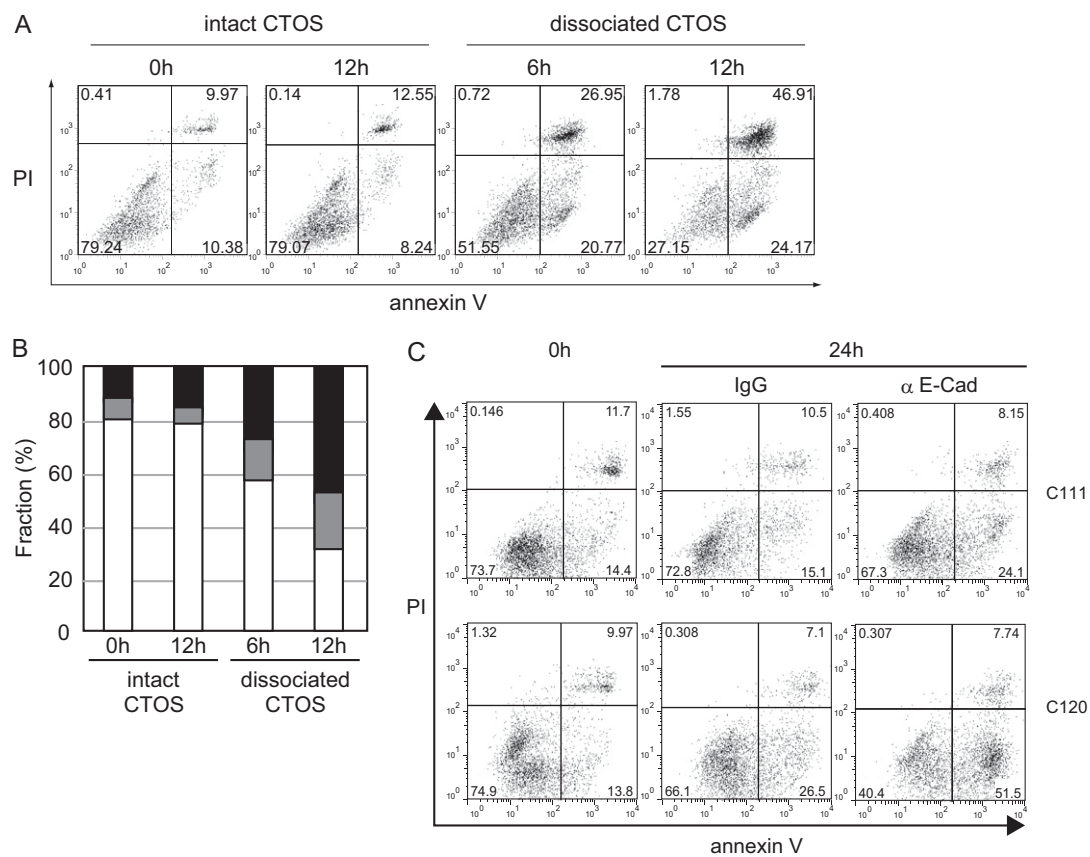

**Fig. S2.** CTOSs retaining cell–cell contact exhibit high viability. (A and B) Flow cytometric analysis of double-stained cells (PI and annexin V). The experiments were performed with the CTOSs from five different patients, and the representative data (C75) is shown. (A) Intact CTOSs were cultured for the indicated time and analyzed right after dissociation. Alternatively, CTOSs were dissociated and single cells were analyzed after culture as indicated. (B) Proportion of cells in A that were positive for both annexin V and PI (black), positive for annexin V only (gray), and negative for both (white). (C) Flow cytometric analysis of the indicated CTOSs treated with the E-cadherin neutralizing antibody. Percentages of the cell population are shown in each quadrant.



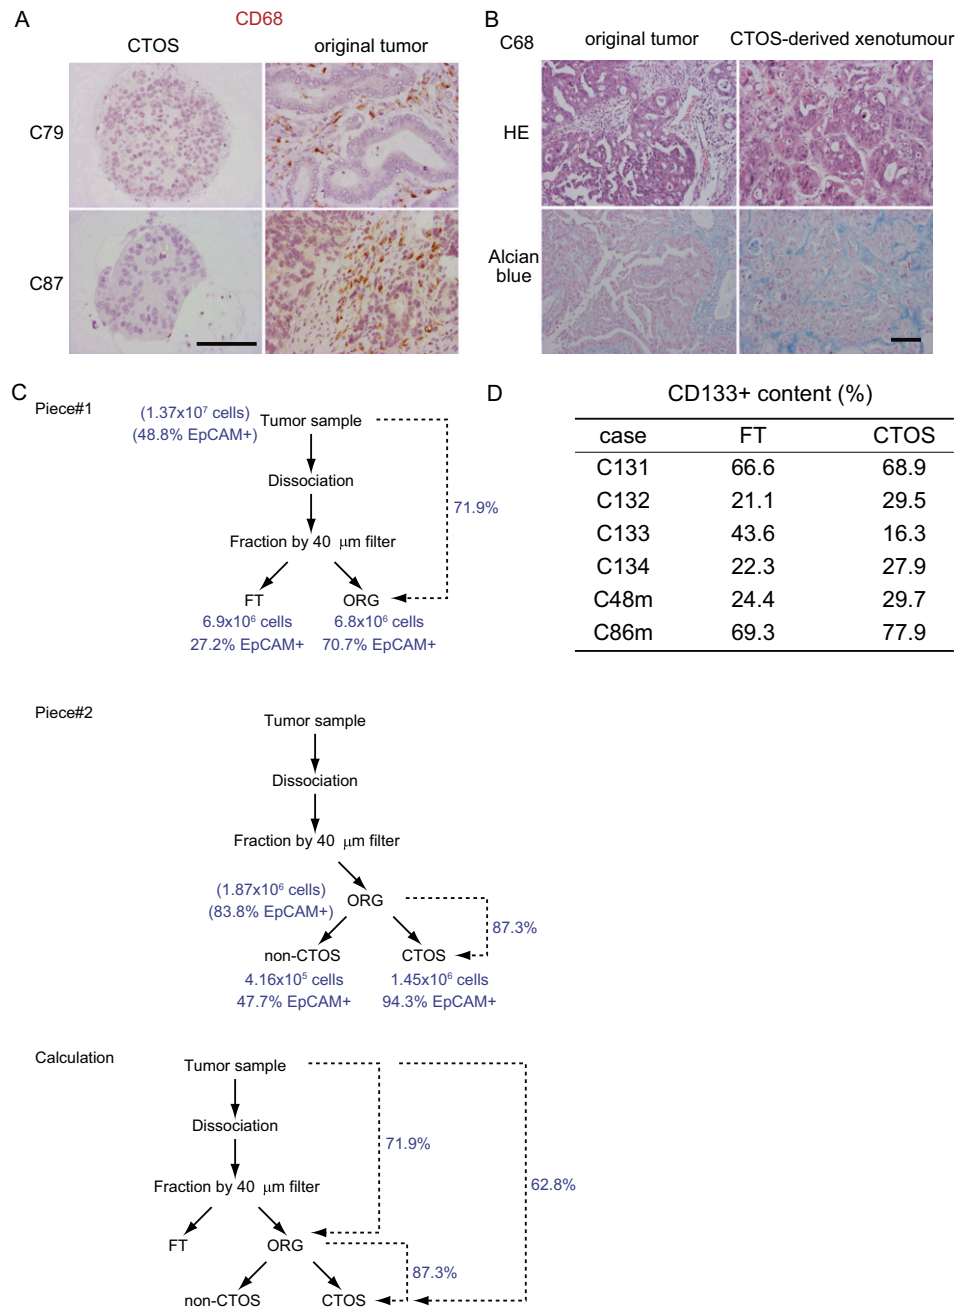

**Fig. S3.** CTOSs preserve characteristics of parental tumors. (A) CD68 staining of tumors and derived CTOSs from two patients. (Scale bar, 100 μm.) (B) H&E staining and Alcian blue staining of tumors from the indicated patients (Left) and the derived xenotumor (Right). (C) Schematic illustration of the process for assessing the recovery rate of EpCAM+ cells in CTOSs. As an example, the results from the C86 xenograft tumor are presented. Tumor specimens were divided into two pieces. Both pieces were mechanically and enzymatically digested, as described in *SI Materials and Methods*, and fractionated with a 40-μm mesh filter. Piece 1: Organoids were dispersed with 0.25% trypsin/EDTA. The cell number of each fraction, FT or ORG, was determined using a hemocytometer. Total cell number was calculated as a sum of the number of FT and ORG cells. The rate of EpCAM+ cells in the FT or ORG was evaluated by FACS analysis. Then the recovery rate of EpCAM+ cells in the ORG from the original tumor was calculated. Piece 2: The ORG was cultured for 1 d in serum-free stem cell medium. The cells draping the CTOSs were detached by pipetting. A mixture of the draping cells and CTOSs was suspended in 15 mL of PBS and centrifuged at 100 × g for 30 s to collect CTOSs as a pellet. The supernatants were centrifuged again at 400 × g for 5 min to collect non-CTOS cells in a pellet. After dispersion with trypsin, the cell numbers of each fraction, non-CTOSs or CTOSs, were counted. The total cell number in the ORG was calculated as a sum of the number of non-CTOS cells and CTOS cells. The rate of EpCAM+ cells in non-CTOSs or CTOSs was evaluated by FACS analysis, and the recovery rate of EpCAM+ cells in CTOSs from the ORG was then calculated. Together, the recovery rate of EpCAM+ cells in CTOSs from the original tumor was calculated. (D) CD133+ fraction of EpCAM+ gated cells in FT cells and CTOSs.





**Table S1. Case description, mutation status, and CTOS characteristics of colorectal cancer specimen**

| Sample ID | Patient age | Patient sex | Tumor location | Tumor histology | TNM stage | Mutation |      |          |      | CTOS      |        |         |
|-----------|-------------|-------------|----------------|-----------------|-----------|----------|------|----------|------|-----------|--------|---------|
|           |             |             |                |                 |           | KRAS     |      | BRAF     |      | Formation | Growth | Passage |
|           |             |             |                |                 |           | Original | CTOS | Original | CTOS |           |        |         |
| C45       | 60          | M           | Ra             | Mod             | IV        | Wild     | G12D | ND       | Wild | Yes       | Yes    | Yes     |
| C48       | 83          | M           | Rab            | Mod             | IIB       | Wild     | Wild | Wild     | Wild | Yes       | Yes    | No      |
| C49       | 68          | M           | Rs             | Well            | IIIB      |          |      |          |      | Yes       | No     |         |
| C50       | 77          | M           | Ce             | Mod             | I         |          |      |          |      | Yes       |        |         |
| C51       | 65          | M           | T              | Mod             | IV        | Wild     | Wild | Wild     | Wild | Yes       | Yes    |         |
| C52       | 51          | M           | S              | Poor            | IV        |          |      |          |      | Yes       |        |         |
| C53       | 60          | F           | Ce             | Muc             | IIB       |          |      |          |      | Yes       | Yes    |         |
| C54       | 63          | M           | Rs             | Well            | IIA       |          |      |          |      | Yes       |        |         |
| C56       | 61          | F           | T              | Poor            | IIIC      |          |      |          |      | No        |        |         |
| C58       | 56          | F           | Rs             | Mod             | IIIC      |          |      |          |      | Yes       |        |         |
| C59       | 57          | F           | Rab            | Mod             | IIIB      | Wild     | Wild | Wild     | Wild | Yes       | Yes    |         |
| C60       | 63          | M           | S              | Mod             | IIA       |          |      |          |      | Yes       |        |         |
| C61       | 64          | F           | Rs             | Mod             | IIB       | G13D     | G13D | ND       | Wild | Yes       | Yes    |         |
| C62       | 74          | F           | A              | Mod             | IIIC      | Wild     | Wild | Wild     | Wild | Yes       | Yes    | Yes     |
| C63       | 79          | F           | D              | Mod             | IIA       |          |      |          |      | Yes       |        |         |
| C64       | 69          | M           | S              | Mod             | IV        |          |      |          |      | Yes       |        |         |
| C65       | 68          | M           | A              | Poor            | I         | Wild     | Wild | Wild     | Wild | Yes       | Yes    | Yes     |
| C66       | 77          | F           | Ce             | Well            | IIIB      | G12V     | G12V |          | Wild | Yes       | Yes    | Yes     |
| C67       | 69          | F           | A              | Mod             | IIIB      |          |      |          |      | Yes       | No     |         |
| C68       | 60          | M           | Rs             | Mod             | IV        | G12D     | G12D | Wild     | Wild | Yes       |        |         |
| C69       | 56          | M           | A              | Mod             | IIIB      | ND       | G12D | ND       | Wild | Yes       |        |         |
| C70       | 71          | M           | Rs             | Mod             | IIIB      |          |      |          |      | Yes       | Yes    |         |
| C71       | 85          | F           | Ce             | Mod             | IIA       | G12D     | G12D | Wild     | Wild | Yes       | Yes    |         |
| C72       | 58          | M           | S              | Mod             | IIB       |          |      |          |      | Yes       | Yes    |         |
| C73       | 38          | M           | S              | Mod             | IIB       | Wild     | Wild | Wild     | Wild | Yes       | No     |         |
| C74       | 64          | F           | S              | Mod             | IIA       |          |      |          |      | Yes       |        |         |
| C75       | 46          | F           | Ra             | Mod             | IV        | wild     | G13D | ND       | Wild | Yes       | Yes    | Yes     |
| C76       | 65          | F           | A              | Endocrine cell  | IIA       | G12D     | Wild | Wild     | Wild | Yes       | No     |         |
| C77       | 75          | F           | Rs             | Well            | IIIB      | Wild     | Wild | Wild     | Wild | Yes       | Yes    | No      |
| C78       | 82          | M           | DS             | Mod             | IIA       | Wild     | Wild | Wild     | Wild | Yes       | No     |         |
| C79       | 78          | M           | T              | Well            | IIA       | Wild     | Wild | Wild     | Wild | Yes       | Yes    | No      |
| C80       | 73          | M           | T              | Muc             | IIA       | G12V     | G12V | Wild     | Wild | Yes       | Yes    | Yes     |
| C81       | 61          | M           | D              | Muc             | IIB       | G12D     | G12D | Wild     | Wild | Yes       | Yes    | Yes     |
| C82       | 66          | M           | Ra             | Poor            | IIIC      | Wild     |      | Wild     |      | Yes       | Yes    |         |
| C83       | 56          | M           | Rs             | Mod             | IIIB      | G12C     |      | Wild     |      | Yes       | No     |         |
| C84       | 76          | F           | Ce             | Mod             | IIIB      | Wild     | G13D |          | Wild | Yes       | Yes    | No      |
| C85       | 64          | M           | Rs             | Mod             | IIA       | G13D     | G13D | Wild     | Wild | Yes       | Yes    |         |
| C86       | 72          | M           | S              | Mod             | IV        |          | G12V |          | Wild | Yes       | Yes    | Yes     |
| C87       | 53          | F           | D              | Mod             | IV        |          |      |          |      | Yes       |        |         |
| C88       | 48          | M           | Rb             | Muc             | IIIB      |          | G12D |          | Wild | Yes       | Yes    |         |
| C89       | 60          | F           | Rb             | Mod             | I         |          |      |          |      | Yes       |        |         |
| C90       | 82          | M           | T              | Well            | IIIB      |          |      |          |      | Yes       |        |         |
| C91       | 61          | M           | Ra             | Mod             | IIIB      |          |      |          |      | Yes       |        |         |
| C92       | 69          | M           | Rb             | Mod             | IV        |          |      |          |      | Yes       |        |         |
| C93       | 71          | F           | Rs             | Mod             | IIIB      | Wild     | Wild | Wild     | Wild | Yes       | Yes    | No      |
| C94       | 67          | F           | Ce             | Well            | IIA       | G12D     |      | Wild     |      | Yes       | Yes    | Yes     |
| C95       | 75          | F           | A              | Well            | IV        |          | G12D |          | Wild | Yes       | No     | No      |
| C96       | 73          | F           | Ce             | Well            | IV        |          | G13D |          | Wild | Yes       | No     | No      |
| C97       | 71          | F           | Rb             | Mod             | IIIC      |          | G13D |          | Wild | Yes       | Yes    | Yes     |
| C98       | 65          | M           | Ce             | Well            | IIIA      |          | Wild |          | Wild | Yes       | Yes    | Yes     |
| C99       | 71          | M           | A              | Mod             | IIIB      |          | Wild |          | Wild | Yes       | No     |         |
| C100      | 79          | M           | T              | Well            | IIIC      |          | Wild |          | Wild | Yes       | Yes    |         |
| C101      | 66          | F           | Rs             | Mod             | IIIC      |          |      |          |      | Yes       |        |         |
| C102      | 77          | F           | S              | Mod             | IV        |          | G13D |          | Wild | Yes       | Yes    |         |
| C103      | 71          | M           | Rs             | Mod             | IIB       |          | G13D |          | Wild | Yes       | Yes    |         |
| C104      | 59          | F           | S              | Mod             | IIIC      |          |      |          |      | Yes       | Yes    | Yes     |
| C105      | 65          | F           | A              | Well            | IIIB      |          |      |          |      | Yes       |        |         |
| C106      | 75          | F           | A              | Well            | IIA       |          |      |          |      | Yes       |        |         |



Table S1. Cont.

| Sample ID | Patient age | Patient sex | Tumor location | Tumor histology | TNM stage | Mutation |      |          |       | CTOS      |        |         |
|-----------|-------------|-------------|----------------|-----------------|-----------|----------|------|----------|-------|-----------|--------|---------|
|           |             |             |                |                 |           | KRAS     |      | BRAF     |       | Formation | Growth | Passage |
|           |             |             |                |                 |           | Original | CTOS | Original | CTOS  |           |        |         |
| C107      | 67          | M           | Ra             | Mod             | IIA       |          |      |          |       | Yes       |        |         |
| C108      | 72          | M           | S              | Mod             | IIIB      |          |      |          |       | Yes       | Yes    |         |
| C109      | 20          | F           | T              | Well            | IV        |          |      |          |       | Yes       |        |         |
| C110      | 77          | M           | Rb             | Mod             | I         |          |      |          |       | Yes       |        |         |
| C111      | 71          | F           | Rs             | Mod             | IV        | Wild     | Wild | Wild     | Wild  | Yes       | Yes    | Yes     |
| C112      | 62          | M           | A              | Mod             | IIIB      | Wild     |      | Wild     |       | Yes       |        |         |
| C113      | 59          | F           | Rb             | Mod             | IIA       | G12D     |      | Wild     |       | Yes       |        |         |
| C114      | 63          | M           | A              | Mod             | I         |          |      |          |       | Yes       | Yes    | No      |
| C115      | 61          | F           | S              | Mod             | IIIB      |          | Wild |          | Wild  | Yes       |        |         |
| C116      | 68          | F           | A              | Mod             | I         |          |      |          |       | Yes       |        |         |
| C117      | 60          | M           | Rb             | Well            | I         |          |      |          |       | Yes       | Yes    |         |
| C118      | 74          | F           | A              | Poor            | IIIC      |          |      |          |       | Yes       |        |         |
| C119      | 81          | M           | T              | Mod             | IIIB      |          |      |          |       | Yes       |        |         |
| C120      | 73          | M           | T              | Mod             | IIA       |          |      |          |       | Yes       | Yes    | Yes     |
| C121      | 76          | M           | Rb             | Well            | I         |          |      |          |       | Yes       | Yes    | No      |
| C122      | 62          | M           | Ra             | Well            | I         |          |      |          |       | Yes       |        |         |
| C123      | 65          | M           | T              | Mod             | IV        |          |      |          |       | Yes       |        |         |
| C124      | 59          | M           | Rs             | Mod             | IV        |          |      |          |       | Yes       |        |         |
| C125      | 66          | M           | Rb             | Mod             | IV        |          |      |          |       | Yes       |        |         |
| C127      | 79          | F           | Rb             | Muc             | IIIB      |          |      |          |       | Yes       |        |         |
| C131      | 56          | F           | S              | Well            | IIIB      |          |      |          |       | Yes       |        |         |
| C132      | 73          | F           | T              | Mod             | IIIB      |          |      |          |       | Yes       | Yes    | Yes     |
| C133      | 76          | M           | D              | Mod             | IIIB      |          |      |          |       | Yes       |        |         |
| C134      | 65          | M           | A              | Mod             | IIIB      |          |      |          |       | Yes       |        |         |
| CLM2      | 50          | F           | lung           |                 | IV        | G12D     | G12D | wild     | Wild  | Yes       | Yes    | Yes     |
| CLM3      | 79          | M           | lung           |                 | IV        | Wild     | Wild | D593G    | D593G | Yes       | Yes    | Yes     |
| CLM4      | 72          | M           | lung           |                 | IV        |          |      |          |       | Yes       |        |         |
| CB1       | 61          | M           | Rb             | Well            | IV        |          |      |          |       | Yes       | Yes    | Yes     |
| CB2       | 32          | F           | Rb             | Well            | IIIC      |          |      |          |       | Yes       | Yes    |         |
| CB3       | 76          | F           | A              | Well            | IIIB      |          | G12V |          | Wild  | Yes       | Yes    | Yes     |
| CB4       | 78          | M           | T              | Well            | IIA       | Wild     | Wild | Wild     | Wild  | Yes       | Yes    | Yes     |
| CB5       | 61          | M           | D              | Mod             | IIB       |          |      |          |       | Yes       |        |         |
| CB6       | 62          | M           | D              | Poor            | IV        |          |      |          |       | No        |        |         |
| CB7       | 64          | M           | Rs             | Well            | IIA       |          |      |          |       | Yes       | No     |         |
| CB8       | 45          | M           | Rb             | Mod             | IIB       | Wild     | Wild | Wild     | Wild  | Yes       | No     |         |
| CB9       | 60          | F           | Rb             | Mod             | I         |          |      |          |       | Yes       |        |         |
| CB10      | 61          | M           | Ra             | Mod             | IIIC      |          |      |          |       | No        |        |         |
| CB11      | 58          | F           | S              | Mod             | IV        |          |      |          |       | Yes       |        |         |
| CB12      | 73          | M           | S              | Mod             | IV        |          |      |          |       | Yes       | No     |         |
| CB14      | 77          | F           | A              | Well            | IV        |          | G12C |          | Wild  | Yes       | Yes    | Yes     |
| CB16      | 69          | M           | Rb             | Well            | IV        |          |      |          |       | Yes       | Yes    | No      |
| CB17      | 79          | M           | Ra             | Well            | IIIA      |          | G12D |          | Wild  | Yes       | Yes    | No      |
| CB18      | 77          | M           | Rs             | Well            | I         |          | G13D |          | Wild  | Yes       | No     |         |
| CB19      | 80          | F           | S              | Mod             | IIA       |          |      |          |       | Yes       |        |         |
| CB20      | 42          | F           | Ras            | Mod             | IIIA      |          |      |          |       | Yes       |        |         |
| CB21      | 62          | M           | Rb             | Mod             | IIIA      |          |      |          |       | Yes       |        |         |
| CB22      | 57          | M           | Rb             | Mod             | I         |          |      |          |       | Yes       | Yes    | Yes     |
| CB23      | 63          | F           | Rb             | Well            | I         |          |      |          |       | Yes       |        |         |
| CB24      | 75          | F           | A              | Group4          | IV        |          |      |          |       | Yes       | No     |         |
| CB25      | 71          | F           | Ra             | Mod             | I         |          |      |          |       | Yes       |        |         |
| CB26      | 72          | F           | Ce             | Mod             | IIA       |          |      |          |       | Yes       |        |         |
| CB27      | 55          | F           | Rb             | Mod             | IIB       |          |      |          |       | Yes       | Yes    | Yes     |
| CB28      | 73          | F           | Ce             | Well            | IV        |          |      |          |       | Yes       | No     |         |
| CB29      | 68          | F           | Ra             | Well            | IV        |          |      |          |       | Yes       | No     |         |
| CB30      | 47          | M           | Rb             | Well            | IIIB      |          |      |          |       | No        |        |         |
| CB31      | 81          | F           | T,S            | Mod             | IIIB      |          |      |          |       | Yes       | Yes    | Yes     |
| CB32      | 67          | M           | Ra             | Well            | I         |          |      |          |       | Yes       | No     |         |
| CB33      | 72          | M           | T              | Well            | I         |          |      |          |       | Yes       | No     |         |
| CB34      | 57          | F           | S              | Well            | I         |          |      |          |       | Yes       | Yes    |         |

CLM, lung metastasis samples; CB, endoscopic biopsy samples. Tumor location: Ce, cecum; A, ascending colon; T, transverse colon; D, descending colon; S, sigmoid colon, Rs, rectosigmoid; Ra, upper rectum; Rb, lower rectum; Muc, mucinous carcinoma; ND, not determined; blank, not assessed.

**Table S2. Number of sites that generated s.c. tumor by CTOS transplantation**

| Case | No. of CTOSs injected |     |     |     |
|------|-----------------------|-----|-----|-----|
|      | 1,000                 | 100 | 50  | 10  |
| C68  | –                     | 1/3 | –   | –   |
| C69  | –                     | 3/4 | –   | –   |
| C86  | 1/2                   | 0/2 | –   | –   |
| C75  | 1/2                   | 0/2 | –   | –   |
| C88  | 1/2                   | 0/2 | –   | –   |
| C81  | 2/2                   | 2/2 | –   | –   |
| C97  | –                     | 2/2 | –   | –   |
| CB1  | –                     | 2/3 | –   | –   |
| CB3  | 1/2                   | 1/2 | –   | –   |
| mC45 | 3/4                   | 2/2 | 2/2 | 1/2 |
| mC48 | 6/6                   | –   | –   | –   |
| mC61 | 8/8                   | 0/2 | –   | –   |

CB: CTOSs derived from endoscopic biopsy samples.

**Table S3. Reported success rates of establishing colon cancer cell lines by standard technique**

| Success rate | Ref. |
|--------------|------|
| 17% (6/35)   | (1)  |
| 29% (13/45)  | (2)  |
| 38% (9/24)   | (3)  |
| 11% (11/99)  | (4)  |

1. Kirkland SC, Bailey IG (1986) Establishment and characterization of six human colorectal adenocarcinoma cell lines. *Br J Cancer* 53:779–785.
2. Willson JKV, et al. (1987) Cell culture of human colon adenomas and carcinomas. *Cancer Res* 47:2704–2713.
3. Park JG, et al. (1987) Characteristics of cell lines established from human colorectal carcinoma. *Cancer Res* 47:6710–6718.
4. Leibovitz A, et al. (1976) Classification of human colorectal adenocarcinoma cell lines. *Cancer Res* 36:4562–4569.
